# Supplementary material
Source: PubMed Central journal article supplement (PMC6636867)
Supplement: Supp_Fig1.pdf [file Supp_Fig1.pdf]

## Supplementary Data

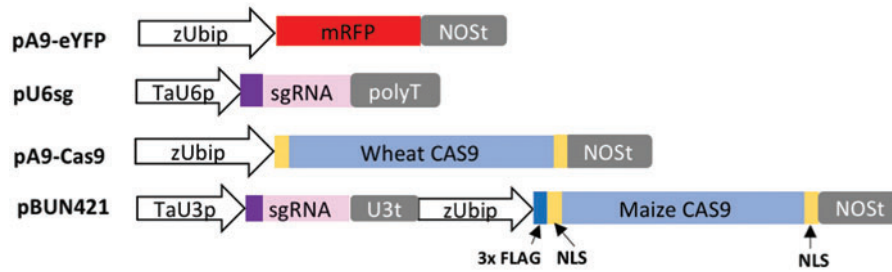

**SUPPLEMENTARY FIG. S1.** Schematic diagram of plasmids. All promoters are shown as white arrows. zUbip is a maize ubiquitin gene promoter; TaU3p and TaU6p are wheat U3 and U6 promoters, respectively. Terminator sequences are shown as gray rectangles. Yellow rectangles correspond to the nuclear localization signals (NLS), purple rectangles correspond to protospacer sequence in the synthetic single-guide RNA (gRNA), and blue rectangles stand for 3 × FLAG sequences.
