# Supplementary material
Source: PubMed Central journal article supplement (PMC6636867)
Supplement: Supp_Fig2.pdf [file Supp_Fig2.pdf]

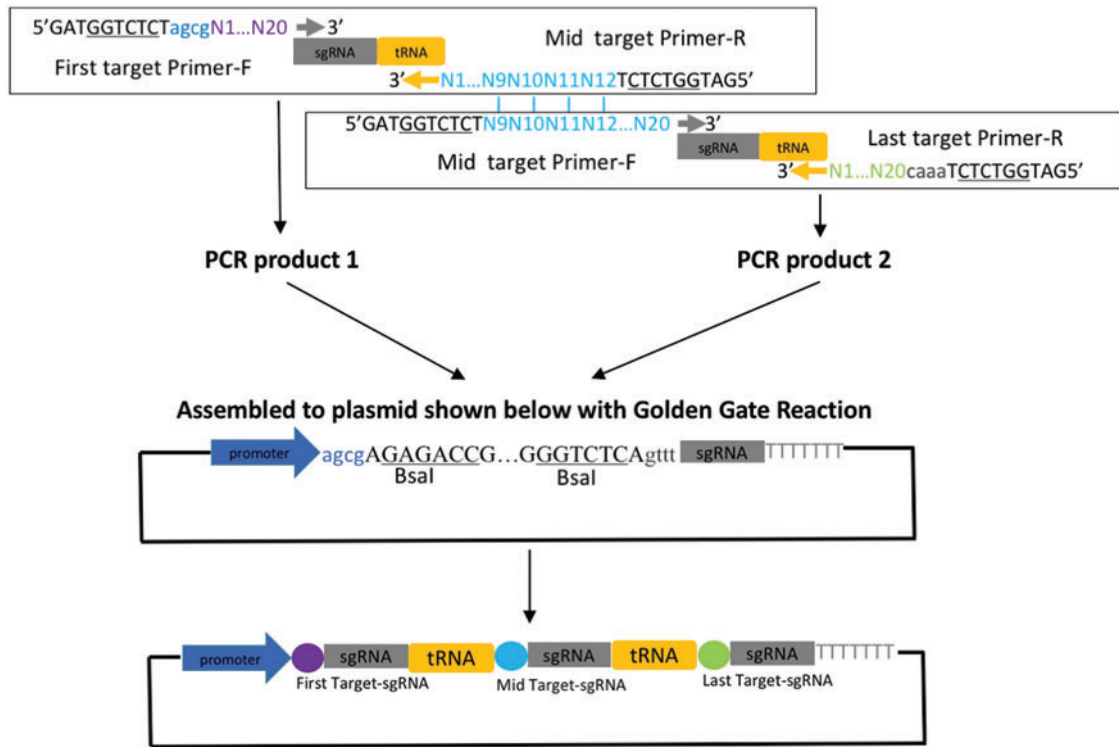

**SUPPLEMENTARY FIG. S2.** Strategy for subcloning the gRNA-tRNA units into the CRISPR-Cas9 construct in one-step Golden Gate reaction. All designed primers had 5'-end tails with the BsaI cut site and full or partial gRNA sequences. After digestion with BsaI, all PCR products had unique sticky ends that could be used for their directional assembly into a single construct using the Golden Gate strategy.
