# Supplementary material
Source: PubMed Central journal article supplement (PMC6636867)
Supplement: Supp_Fig4.pdf [file Supp_Fig4.pdf]

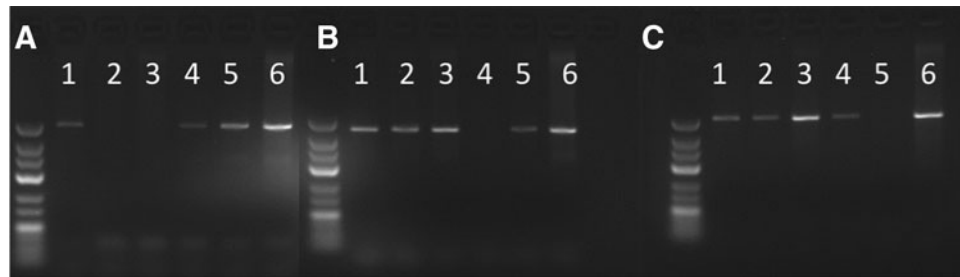

**SUPPLEMENTARY FIG. S4.** PCR amplification of Chinese Spring (CS) nullisomic-tetrasomic lines with the genome-specific primer sets **(A)** GW2T2AcheckF and GW2T2AcheckR, **(B)** GW2T2BcheckF and GW2T2BcheckR, and **(C)** GW2T2DcheckF and GW2T2DcheckR. DNA of each lane is numbered: 1, CS; 2, nullisomic 6A-tetrasomic 6B (N6A-T6B); 3, N6A-T6D; 4, N6B-T6D; 5, N6DT6A; 6, cultivar Bobwhite. From the top to the bottom, the DNA ladder fragment lengths are 700 bp, 500 bp, 400 bp, 300 bp, 200 bp, 150 bp, and 100 bp.
