# Supplementary material
Source: PubMed Central journal article supplement (PMC6636867)
Supplement: Supp_Fig7.pdf [file Supp_Fig7.pdf]

|                    |                                           |              |                     |                                           |              |
|--------------------|-------------------------------------------|--------------|---------------------|-------------------------------------------|--------------|
| <b>A GLM-7</b>     |                                           |              | <b>D GLM-7-3-11</b> |                                           |              |
| A:                 | CGAGGCCAAGCTCGCGCCCTGCTACCCGGGGGCTGACGAC  | WT 134 reads | A:                  | CGAGGCCAAGCTCGCGCCCTGCTACCCGGGGGCTGACGAC  | WT 167 reads |
|                    | CGAGGCCAAGCTCGCGCCCTGCTAC--CGGGGGCTGACGAC | -1 4 reads   |                     | CGAGGCCAAGCTCGCGCCCTGCTAC--CGGGGGCTGACGAC | -1 164 reads |
| B:                 | CGAGGCCAAGCTCGCGCCCTGCTACCCGGGGGCTGACGAC  | WT 134 reads |                     | CGAGGCCAAGCTCGCGCCCTGCTACCTCGGGGGCTGACGAC | +1 2 reads   |
|                    | CGAGGCCAAGCTCGCGCCCTGCTAC--CGGGGGCTGACGAC | -1 2 reads   | B:                  | CGAGGCCAAGCTCGCGCCCTGCTACCCGGGGGCTGACGAC  | WT 123 reads |
|                    | CGAGGCCAAGCTCGCGCCCTGCTA--CGGGGGCTGACGAC  | -2 4 reads   |                     | CGAGGCCAAGCTCGCGCCCTGCTA--CGGGGGCTGACGAC  | -2 2 reads   |
|                    | CGAGGCCAAGCTCGCGCCCTGCT-----AC            | -16 2 reads  |                     | CGAGGCCAAGCTCGCGCCCTGCTAC--CGGGGGCTGACGAC | -1 12 reads  |
| D:                 | CGAGGCCAAGCTCGCGCCCTGCTACCCGGGGGCTGACGAC  | WT 150 reads | D:                  | CGAGGCCAAGCTCGCGCCCTGCTACCCGGGGGCTGACGAC  | WT 121 reads |
|                    |                                           |              |                     | CGAGGCCAAGCTCGCGCCCTGCTAC--CGGGGGCTGACGAC | -1 164 reads |
|                    |                                           |              |                     | CGAGGCCAAGCTCGCGCCCTGCTACCTCGGGGGCTGACGAC | +1 2 reads   |
| <b>B GLM-7-3</b>   |                                           |              | <b>E GLM-7-3-20</b> |                                           |              |
| A:                 | CGAGGCCAAGCTCGCGCCCTGCTACCCGGGGGCTGACGAC  | WT 74 reads  | A:                  | CGAGGCCAAGCTCGCGCCCTGCTACCCGGGGGCTGACGAC  | WT 138 reads |
|                    | CGAGGCCAAGCTCGCGCCCTGCTAC--CGGGGGCTGACGAC | -1 68 reads  |                     | CGAGGCCAAGCTCGCGCCCTGCTAC--CGGGGGCTGACGAC | -1 114 reads |
|                    | CGAGGCCAAGCTCGCGCCCTGCTA--CGGGGGCTGACGAC  | -2 2 reads   |                     | CGAGGCCAAGCTCGCGCCCTGCTA--CGGGGGCTGACGAC  | -2 9 reads   |
|                    | CGAGGCCAAGCTCGCGCCCTGCT-----GGGGCTGACGAC  | -5 2 reads   |                     | CGAGGCCAA-----GACGAC                      | -25 2 reads  |
| B:                 | CGAGGCCAAGCTCGCGCCCTGCTACCCGGGGGCTGACGAC  | WT 46 reads  |                     | CGAGGCCAAGCTCGCGC-----CCGCTGGG            | -24 2 reads  |
|                    | CGAGGCCAAGCTCGCGCCCTGCTAC--CGGGGGCTGACGAC | -1 2 reads   |                     | CGAGGCCAAGCTCGCGCCCTGCT--CCGGGGCTGACGAC   | -1 1 reads   |
| D:                 | CGAGGCCAAGCTCGCGCCCTGCTACCCGGGGGCTGACGAC  | WT 118 reads |                     | CGAGGCCAAGCTCGCGCCCTGCTACCTCGGGGGCTGACGAC | +1 2 reads   |
|                    | CGAGGCCAAGCTCGCGCCCTGCTACTCGGGGGCTGACGAC  | +1 2 reads   | B:                  | CGAGGCCAAGCTCGCGCCCTGCTACCCGGGGCTGACGAC   | WT 118 reads |
|                    | CGAGGCCAAGCTCGCGCCCTGCTAC--CGGGGGCTGACGAC | -1 2 reads   |                     | CGAGGCCAAGCTCGCGCCCTGCTAC--CGGGGGCTGACGAC | -1 66 reads  |
|                    |                                           |              | D:                  | CGAGGCCAAGCTCGCGCCCTGCTACCCGGGGGCTGACGAC  | WT 233 reads |
| <b>C GLM-7-3-8</b> |                                           |              |                     | CGAGGCCAAGCTCGCGCCCTGCTAC--CGGGGGCTGACGAC | -1 12 reads  |
| A:                 | CGAGGCCAAGCTCGCGCCCTGCTACCCGGGGGCTGACGAC  | WT 126 reads |                     | CGAGGCCAAGCTCGCGCCCTGCTACCTCGGGGGCTGACGAC | +1 8 reads   |
|                    | CGAGGCCAAGCTCGCGCCCTGCTAC--CGGGGGCTGACGAC | -1 156 reads |                     |                                           |              |
| B:                 | CGAGGCCAAGCTCGCGCCCTGCTACCCGGGGGCTGACGAC  | WT 330 reads |                     |                                           |              |
|                    | CGAGGCCAAGCTCGCGCCCTGCTACTCGGGGGCTGACGAC  | +1 226 reads |                     |                                           |              |
|                    | CGAGGCCAAGCTCGCGCCCTGCTAC--CGGGGGCTGACGAC | -1 28 reads  |                     |                                           |              |
| D:                 | CGAGGCCAAGCTCGCGCCCTGCTACCCGGGGGCTGACGAC  | WT 261 reads |                     |                                           |              |
|                    | CGAGGCCAAGCTCGCGCCCTGCTACTCGGGGGCTGACGAC  | +1 6 reads   |                     |                                           |              |
|                    | CGAGGCCAAGCTCGCGCCCTGCTAC--CGGGGGCTGACGAC | -1 14 reads  |                     |                                           |              |
|                    | CGAGGCCAAGCTCGCGCCCTGCTA--ACGGGGGCTGACGAC | -1 2 reads   |                     |                                           |              |
|                    | CGAGGCCAAGCTCGCGCCCTGCTA--CGGGGGCTGACGAC  | -2 2 reads   |                     |                                           |              |

**SUPPLEMENTARY FIG. S7.** Transgenerational CRISPR-Cas9 activity induces new mutations in the *TaGW2* gene. The GW2T2 target site was amplified and sequenced by NGS. All identified read types for **(A)** T<sub>0</sub> line GLM-7 and its **(B)** T<sub>1</sub>, **(C-E)** T<sub>2</sub> progenies are shown. WT, wild-type alleles in wheat cultivar Bobwhite; “-” and “+” signs and numbers after them, nucleotides deleted and inserted, respectively. The detected numbers of each read type are shown on the right.
