# Supplementary material
Source: PubMed Central journal article supplement (PMC6636867)
Supplement: Supp_Fig8.pdf [file Supp_Fig8.pdf]

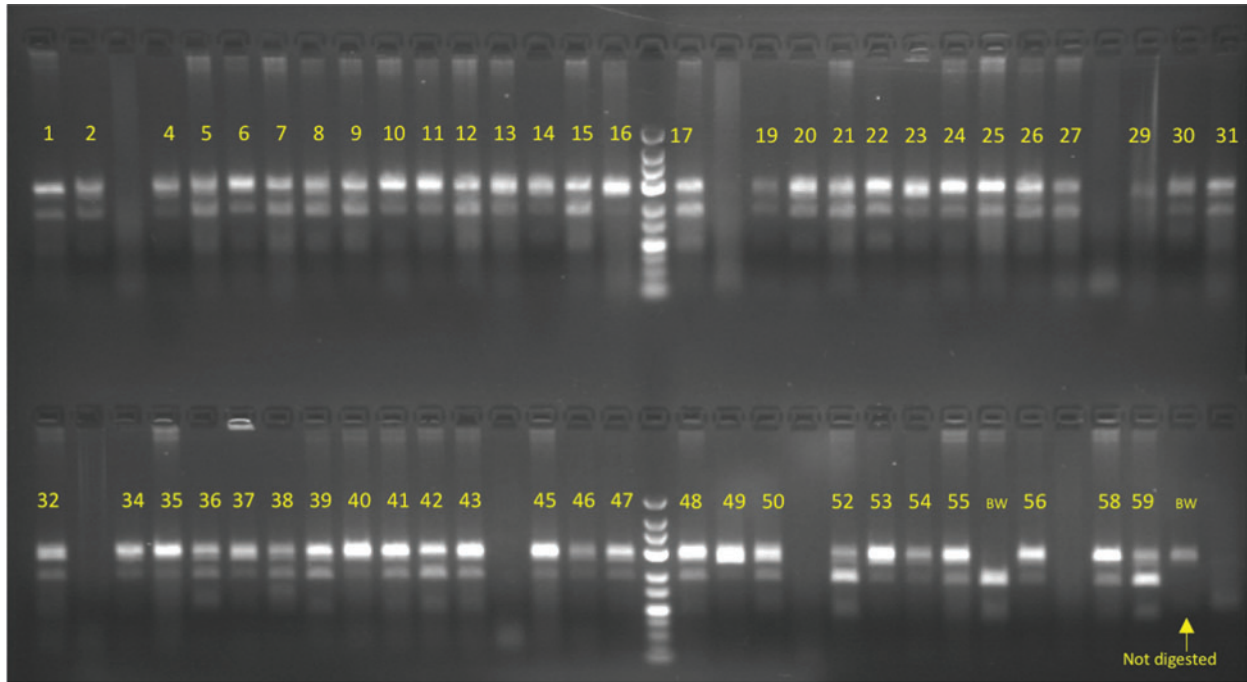

**SUPPLEMENTARY FIG. S8.** Restriction enzyme digestion of PCR amplicons to screen additional *gw2* knockout mutations in the T<sub>3</sub> progenies of line GLM-2-9-49. GW2T2 flanking region were amplified by PCR and digested with XmaI; non-digested PCR amplicons correspond to mutated GW2T2 target sites. The numbers on the gel image are identifiers of the GLM-2-9-49 progenies. Lane marked with arrows is PCR product from wild-type plant not digested with XmaI and loaded as control. BW, wild-type cultivar Bobwhite. From the top to the bottom, the DNA ladder fragment lengths are 700 bp, 500 bp, 400 bp, 300 bp, 200 bp, 150 bp, and 100 bp.
