# Supplementary material
Source: PubMed Central journal article supplement (PMC6636867)
Supplement: Supp_Fig9.pdf [file Supp_Fig9.pdf]

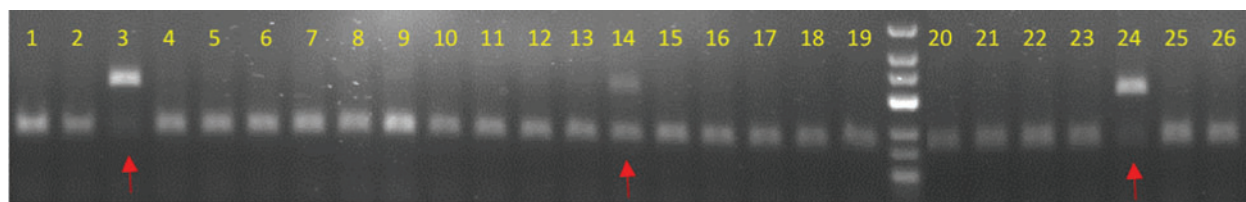

**SUPPLEMENTARY FIG. S9.** Restriction enzyme digestion of PCR amplicons to screen mutations in the *TaLpx-1* gene in the  $T_2$  progenies of line GLM-2-5. LPX1T2 flanking region was amplified by PCR and digested with *Sall*; non-digested PCR amplicons correspond to mutated LPX1T2 target sites. The numbers on the gel image are identifiers of the GLM-2-5 progenies. Lanes marked with arrows have non-digested PCR products. From the top to the bottom, the DNA ladder fragment lengths are 700 bp, 500 bp, 400 bp, 300 bp, 200 bp, 150 bp, and 100 bp.
