# Supplementary material
Source: PubMed Central journal article supplement (PMC6636867)
Supplement: Supp_Figs7-9.pdf [file Supp_Figs7-9.pdf]

|                                             |     |           |  |
|---------------------------------------------|-----|-----------|--|
| <b>A GLM-7</b>                              |     |           |  |
| A: CGAGGCCAAGCTCGCGCCCTGCTACCCGGGGGCTGACGAC | WT  | 134 reads |  |
| CGAGGCCAAGCTCGCGCCCTGCTAC--CGGGGGCTGACGAC   | -1  | 4 reads   |  |
| B: CGAGGCCAAGCTCGCGCCCTGCTACCCGGGGGCTGACGAC | WT  | 134 reads |  |
| CGAGGCCAAGCTCGCGCCCTGCTAC--CGGGGGCTGACGAC   | -1  | 2 reads   |  |
| CGAGGCCAAGCTCGCGCCCTGCTA--CGGGGGCTGACGAC    | -2  | 4 reads   |  |
| CGAGGCCAAGCTCGCGCCCTGCT-----AC              | -16 | 2 reads   |  |
| D: CGAGGCCAAGCTCGCGCCCTGCTACCCGGGGGCTGACGAC | WT  | 150 reads |  |
| <b>B GLM-7-3</b>                            |     |           |  |
| A: CGAGGCCAAGCTCGCGCCCTGCTACCCGGGGGCTGACGAC | WT  | 74 reads  |  |
| CGAGGCCAAGCTCGCGCCCTGCTAC--CGGGGGCTGACGAC   | -1  | 68 reads  |  |
| CGAGGCCAAGCTCGCGCCCTGCTA--CGGGGGCTGACGAC    | -2  | 2 reads   |  |
| CGAGGCCAAGCTCGCGCCCTGCT-----GGGGCTGACGAC    | -5  | 2 reads   |  |
| B: CGAGGCCAAGCTCGCGCCCTGCTACCCGGGGGCTGACGAC | WT  | 46 reads  |  |
| CGAGGCCAAGCTCGCGCCCTGCTAC--CGGGGGCTGACGAC   | -1  | 2 reads   |  |
| D: CGAGGCCAAGCTCGCGCCCTGCTACCCGGGGGCTGACGAC | WT  | 118 reads |  |
| CGAGGCCAAGCTCGCGCCCTGCTACCTCGGGGGCTGACGAC   | +1  | 2 reads   |  |
| CGAGGCCAAGCTCGCGCCCTGCTAC--CGGGGGCTGACGAC   | -1  | 2 reads   |  |
| <b>C GLM-7-3-8</b>                          |     |           |  |
| A: CGAGGCCAAGCTCGCGCCCTGCTACCCGGGGGCTGACGAC | WT  | 126 reads |  |
| CGAGGCCAAGCTCGCGCCCTGCTAC--CGGGGGCTGACGAC   | -1  | 156 reads |  |
| B: CGAGGCCAAGCTCGCGCCCTGCTACCCGGGGGCTGACGAC | WT  | 330 reads |  |
| CGAGGCCAAGCTCGCGCCCTGCTACCTCGGGGGCTGACGAC   | +1  | 226 reads |  |
| CGAGGCCAAGCTCGCGCCCTGCTAC--CGGGGGCTGACGAC   | -1  | 28 reads  |  |
| D: CGAGGCCAAGCTCGCGCCCTGCTACCCGGGGGCTGACGAC | WT  | 261 reads |  |
| CGAGGCCAAGCTCGCGCCCTGCTACCTCGGGGGCTGACGAC   | +1  | 6 reads   |  |
| CGAGGCCAAGCTCGCGCCCTGCTAC--CGGGGGCTGACGAC   | -1  | 14 reads  |  |
| CGAGGCCAAGCTCGCGCCCTGCTA--ACGGGGGCTGACGAC   | -1  | 2 reads   |  |
| CGAGGCCAAGCTCGCGCCCTGCTA--CGGGGGCTGACGAC    | -2  | 2 reads   |  |
| <b>D GLM-7-3-11</b>                         |     |           |  |
| A: CGAGGCCAAGCTCGCGCCCTGCTACCCGGGGGCTGACGAC | WT  | 167 reads |  |
| CGAGGCCAAGCTCGCGCCCTGCTAC--CGGGGGCTGACGAC   | -1  | 164 reads |  |
| CGAGGCCAAGCTCGCGCCCTGCTACCTCGGGGGCTGACGAC   | +1  | 2 reads   |  |
| B: CGAGGCCAAGCTCGCGCCCTGCTACCCGGGGGCTGACGAC | WT  | 123 reads |  |
| CGAGGCCAAGCTCGCGCCCTGCTA--CGGGGGCTGACGAC    | -2  | 2 reads   |  |
| CGAGGCCAAGCTCGCGCCCTGCTAC--CGGGGGCTGACGAC   | -1  | 12 reads  |  |
| D: CGAGGCCAAGCTCGCGCCCTGCTACCCGGGGGCTGACGAC | WT  | 121 reads |  |
| CGAGGCCAAGCTCGCGCCCTGCTAC--CGGGGGCTGACGAC   | -1  | 164 reads |  |
| CGAGGCCAAGCTCGCGCCCTGCTACCTCGGGGGCTGACGAC   | +1  | 2 reads   |  |
| <b>E GLM-7-3-20</b>                         |     |           |  |
| A: CGAGGCCAAGCTCGCGCCCTGCTACCCGGGGGCTGACGAC | WT  | 138 reads |  |
| CGAGGCCAAGCTCGCGCCCTGCTAC--CGGGGGCTGACGAC   | -1  | 114 reads |  |
| CGAGGCCAAGCTCGCGCCCTGCTA--CGGGGGCTGACGAC    | -2  | 9 reads   |  |
| CGAGGCCAA-----GACGAC                        | -25 | 2 reads   |  |
| CGAGGCCAAGCTCGCGC-----//-----CCGCTGGG       | -24 | 2 reads   |  |
| CGAGGCCAAGCTCGCGCCCTGCT--CCCGGGGGCTGACGAC   | -1  | 1 reads   |  |
| CGAGGCCAAGCTCGCGCCCTGCTACCTCGGGGGCTGACGAC   | +1  | 2 reads   |  |
| B: CGAGGCCAAGCTCGCGCCCTGCTACCCGGGGGCTGACGAC | WT  | 118 reads |  |
| CGAGGCCAAGCTCGCGCCCTGCTAC--CGGGGGCTGACGAC   | -1  | 66 reads  |  |
| D: CGAGGCCAAGCTCGCGCCCTGCTACCCGGGGGCTGACGAC | WT  | 233 reads |  |
| CGAGGCCAAGCTCGCGCCCTGCTAC--CGGGGGCTGACGAC   | -1  | 12 reads  |  |
| CGAGGCCAAGCTCGCGCCCTGCTACCTCGGGGGCTGACGAC   | +1  | 8 reads   |  |

**SUPPLEMENTARY FIG. S7.** Transgenerational CRISPR-Cas9 activity induces new mutations in the *TaGW2* gene. The GW2T2 target site was amplified and sequenced by NGS. All identified read types for **(A)** T<sub>0</sub> line GLM-7 and its **(B)** T<sub>1</sub>, **(C-E)** T<sub>2</sub> progenies are shown. WT, wild-type alleles in wheat cultivar Bobwhite; “-” and “+” signs and numbers after them, nucleotides deleted and inserted, respectively. The detected numbers of each read type are shown on the right.

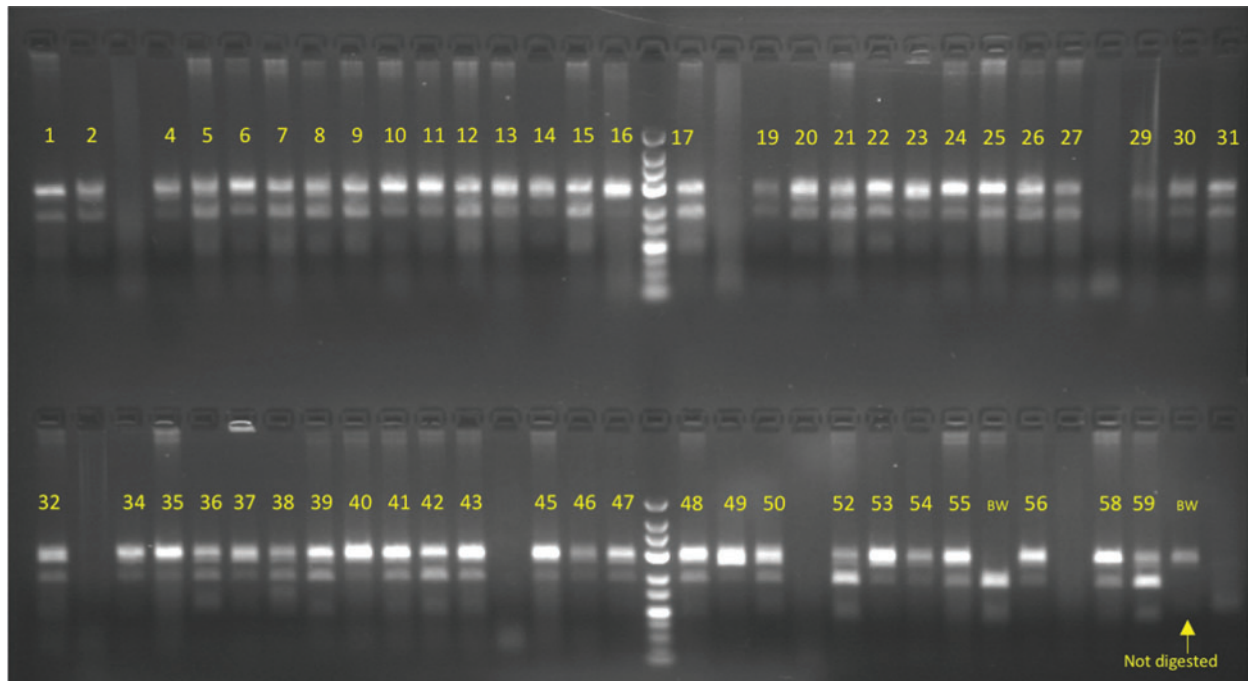

**SUPPLEMENTARY FIG. S8.** Restriction enzyme digestion of PCR amplicons to screen additional *gw2* knockout mutations in the  $T_3$  progenies of line GLM-2-9-49. GW2T2 flanking region were amplified by PCR and digested with XmaI; non-digested PCR amplicons correspond to mutated GW2T2 target sites. The numbers on the gel image are identifiers of the GLM-2-9-49 progenies. Lane marked with arrows is PCR product from wild-type plant not digested with XmaI and loaded as control. BW, wild-type cultivar Bobwhite. From the top to the bottom, the DNA ladder fragment lengths are 700 bp, 500 bp, 400 bp, 300 bp, 200 bp, 150 bp, and 100 bp.

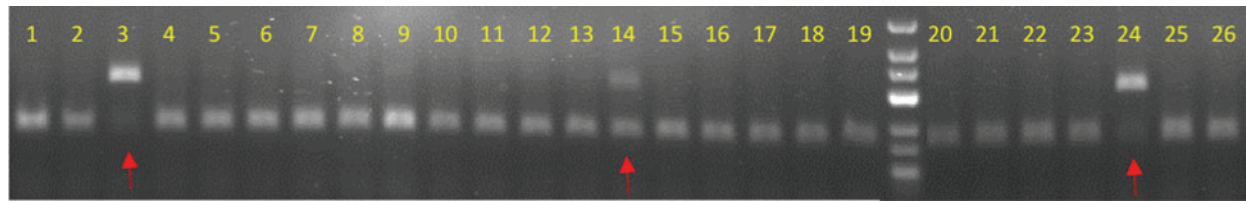

**SUPPLEMENTARY FIG. S9.** Restriction enzyme digestion of PCR amplicons to screen mutations in the *TaLpx-1* gene in the  $T_2$  progenies of line GLM-2-5. LPX1T2 flanking region was amplified by PCR and digested with *Sall*; non-digested PCR amplicons correspond to mutated LPX1T2 target sites. The numbers on the gel image are identifiers of the GLM-2-5 progenies. Lanes marked with arrows have non-digested PCR products. From the top to the bottom, the DNA ladder fragment lengths are 700 bp, 500 bp, 400 bp, 300 bp, 200 bp, 150 bp, and 100 bp.
